# Supplementary material for: The Relation between Plasma Nesfatin-1 Levels and Aggressive Behavior in Pit Bull Dogs
Source: MDPI journal article supplement (doi:10.3390/ani14040632), 2024-02-16
Supplement: s1 [file s1]

**Aggression Test**

Ear/cage number:

Race:

Gender:

Age:

Arrival date:

Neutered date:

Known acute or chronic illness:

Known incidents of violence (biting, dog fighting, harming employees, etc.):

Body mass index (numbering 1-5) (muscle condition and weight height should be considered):

|    | Questions                                                                                               | Never | Rarely | Often | Always |
|----|---------------------------------------------------------------------------------------------------------|-------|--------|-------|--------|
| 1  | Aggressive when its food is touched while it is eating                                                  | ①     | ②      | ③     | ④      |
| 2  | Aggressive when it is passed while eating                                                               | ①     | ②      | ③     | ④      |
| 3  | Aggressive when food is added to its bowl while eating                                                  | ①     | ②      | ③     | ④      |
| 4  | Aggressive when its food is taken                                                                       | ①     | ②      | ③     | ④      |
| 5  | Aggressive when awakened by physical contact                                                            | ①     | ②      | ③     | ④      |
| 6  | Aggressive when physically disturbed at rest                                                            | ①     | ②      | ③     | ④      |
| 7  | Aggressive when attempting to get it out of the cage                                                    | ①     | ②      | ③     | ④      |
| 8  | Aggressive with more than 5 seconds of eye contact                                                      | ①     | ②      | ③     | ④      |
| 9  | Aggressive at grooming, nail clipping, ear cleaning, or other painless procedures                       | ①     | ②      | ③     | ④      |
| 10 | Aggressive when grabbed by the leash and pulled back                                                    | ①     | ②      | ③     | ④      |
| 11 | Aggressive when removing or putting on the collar                                                       | ①     | ②      | ③     | ④      |
| 12 | Aggressive to loud sounds                                                                               | ①     | ②      | ③     | ④      |
| 13 | Aggressive when threatened from afar by showing a newspaper, stick, or hand                             | ①     | ②      | ③     | ④      |
| 14 | Aggressive when walking next to it in the cage                                                          | ①     | ②      | ③     | ④      |
| 15 | Aggressive when asked to respond to commands                                                            | ①     | ②      | ③     | ④      |
| 16 | It wants to go to a determined place when it leaves the cage                                            | ①     | ②      | ③     | ④      |
| 17 | Aggressive when unfollowing its path                                                                    | ①     | ②      | ③     | ④      |
| 18 | Overprotective toward those it loves.                                                                   | ①     | ②      | ③     | ④      |
| 19 | Aggressive when a stranger touches loved ones                                                           | ①     | ②      | ③     | ④      |
| 20 | Aggressive when accidentally pressed on its tail or one of its limbs                                    | ①     | ②      | ③     | ④      |
| 21 | Aggressive when a stranger approaches                                                                   | ①     | ②      | ③     | ④      |
| 22 | Responds to restlessness, loss of appetite, tremors, and excessive salivation when the keeper leaves it | ①     | ②      | ③     | ④      |
